# Supplementary material for: Identification of Cacao Mild Mosaic Virus (CaMMV) and Cacao Yellow Vein-Banding Virus (CYVBV) in Cocoa (Theobroma cacao) Germplasm
Source: MDPI journal article supplement (doi:10.3390/v13112152), 2021-10-26
Supplement: s1 [file s1]

ICS 27 Symptomatic  
ICS 27 Asymptomatic  
KX276641 ICS 27

Consensus  
CTAGTCATGCCGTTCCGATTAAAGAATGCTCCAGCCATT TTTTCAAAGAAAGATGGACAAC TGCTTTAAAGGAACAGAAGAA TTTATAGCA

Conservation

ICS 27 Symptomatic  
ICS 27 Asymptomatic  
KX276641 ICS 27

Consensus  
GTTTATATTGATGATATCCTAGTCTTCTCACAGACTGAGGAAGAACATGTCCGTCATCTACAAGGTTCTTCCAGATATGCCAGAAGCAT

Conservation

ICS 27 Symptomatic  
ICS 27 Asymptomatic  
KX276641 ICS 27

Consensus  
GGGTTAGTCTCGTAGTAAGGATAAGATGGTAATAGCAGTCCCACAAATTGAGTTCTTGAGGCCATTATTGGTAACAGGAAGATCAAGCTA

Conservation

ICS 27 Symptomatic  
ICS 27 Asymptomatic  
KX276641 ICS 27

Consensus  
CAGCCTCACATCATCAGAAAAATTTGCTAAC TTTCTGATGACCAACTGAAAGAAAAGAAAGGTTGCGTAGCTGGCTCGGAATACTCAAT

Conservation

ICS 27 Symptomatic  
ICS 27 Asymptomatic  
KX276641 ICS 27

Consensus  
TATGCCAGGAATTATATTCCTAAGCTAGGCAGCTGTTAGGCCATTATACAACAAGACAAGTCCCCATGGCAGACAAAAGGATGGCTGCA

Conservation

ICS 27 Symptomatic  
ICS 27 Asymptomatic  
KX276641 ICS 27

Consensus  
TCAGACTGGAATCTGATCAAGAAAAATAAGGAAAAGGTTCAAGCACTACCAGACATGGAGCTACCACCNNAAGATGCC TTCGTAAATAATC

Conservation

ICS 27 Symptomatic  
ICS 27 Asymptomatic  
KX276641 ICS 27

Consensus  
GAGACTGATGGTTGTACAGAAGGATGGGGAGCAGTAGCCAAGTGGCGTCTTTCAAAGGAGCATCTCGAGGTACTGAAAGGCTTTTGCC

Conservation

ICS 27 Symptomatic  
ICS 27 Asymptomatic  
KX276641 ICS 27

Consensus  
TATGCTAGTGGACGCTTTCCAGCACTACAATCCACGATTGATGCCGAGATATCTGCTTTAATCAATGGGTTGGAATCTTTCAAAATCCAC

Conservation

ICS 27 Symptomatic  
ICS 27 Asymptomatic  
KX276641 ICS 27

Consensus  
TACCTCGATAAAGGTGAAATAATGGTACGAACAGACTGCCACGCCATTGTGAGCTTTTACAATAAGCTGCATGCCAACAAC

Conservation

2

**Table S1.** PCR primers used in detection of cacao mild mosaic virus (CaMMV) and cacao yellow vein-banding virus (CYVBV).

| Specificity | Primer name  | Primer sequence      | Ta (°C) | Amplicon size (bp) |
|-------------|--------------|----------------------|---------|--------------------|
| CaMMV       | CaMMV2_6292F | TCTGTGCTTATGCGAGTGGT | 64      | 193                |
|             | CaMMV2_6484R | CTTAGCCGCGAAGGTTTATG |         |                    |
|             | CaMMV1_5507F | CCAATATCCGCTACCAGGAA | 62      | 861                |
|             | CaMMV2_6367R | GCGTGTAGGACCGCACTAAT |         |                    |
| CYVBV       | CYVBV1_5772F | CTAGTCATGCCGTTCCGATT | 64      | 183                |
|             | CYVBV1_5954R | CCCATGCTTCTGGCATATCT |         |                    |
|             | CYVBV1_5772F | CTAGTCATGCCGTTCCGATT | 62      | 803                |
|             | CYVBV2_6573R | GTTTGTGGCATGCAGCTTA  |         |                    |

**Table S2.** Loop-Mediated Isothermal Amplification (LAMP) primers used in detection of cacao yellow vein-banding virus (CYVBV).

| Primer name | Primer Sequence                              | Concentration in 10X primermix (μM) |
|-------------|----------------------------------------------|-------------------------------------|
| CYVBV_F3    | AGACTGGAATCTGATCAAGAA                        | 2                                   |
| CYVBV_B3    | AGCGTCCACTAGCATAGG                           | 2                                   |
| CYVBV_FIP   | AGTCTCGATTATTACGAAGGCATCAAAGGTTCAAGCACTACCAG | 16                                  |
| CYVBV_BIP   | TGGTTGTACAGAAGGATGGGGCAAAGCCTTTTCAGTACCT     | 16                                  |
| CYVBV_LF    | TTTGTTGGTAGCTCCATGT                          | 4                                   |
| CYVBV_LB    | CAGTAGCCAAGTGGCGTCC                          | 4                                   |

**Table S3.** Summary of Sequence Read Archive (SRA) experiments analysed in this study. Information on Bioproject number, SRA run number, average read length, size of the dataset, name of accession, tree ID (when available) and source of sample material are provided. Red and blue font colour represent the datasets found positive for caco mild mosaic virus (CaMMV) and caco yellow vein banding virus (CYVBV), respectively.

| BioProject      | Run        | Avg. length | Size (Mb) | Sample name            | Tree ID    | Source of material |
|-----------------|------------|-------------|-----------|------------------------|------------|--------------------|
| PRJNA486150 [1] | SRR7961411 | 200         | 17        | CL 10/11               |            | ICG-T              |
|                 | SRR7961410 | 200         | 154       | CL 10/3                |            | ICG-T              |
|                 | SRR7961409 | 200         | 467       | CLM 100                |            | ICG-T              |
|                 | SRR7961408 | 200         | 454       | GS 6                   |            | ICG-T              |
|                 | SRR7961407 | 200         | 317       | GS 61                  |            | ICG-T              |
|                 | SRR7961406 | 200         | 168       | GU 175/P_1             |            | ICG-T              |
|                 | SRR7961405 | 200         | 34        | GU 175/P_2             |            | ICG-T              |
|                 | SRR7961404 | 200         | 101       | ICS 1_1                |            | ICG-T              |
|                 | SRR7961403 | 200         | 152       | ICS 1_2                |            | ICG-T              |
|                 | SRR7961402 | 200         | 59        | ICS 28                 |            | ICG-T              |
|                 | SRR7961427 | 200         | 123       | ICS 87                 |            | ICG-T              |
|                 | SRR7961426 | 200         | 288       | IMC 6                  |            | ICG-T              |
|                 | SRR7961429 | 200         | 62        | IMC 67_1               |            | ICG-T              |
|                 | SRR7961428 | 200         | 12        | IMC 67_2               |            | ICG-T              |
|                 | SRR7961423 | 200         | 357       | LCT EEN23              |            | ICG-T              |
|                 | SRR7961422 | 200         | 260       | LCT EEN246             |            | ICG-T              |
|                 | SRR7961425 | 200         | 272       | LCT EEN31              |            | ICG-T              |
|                 | SRR7961424 | 200         | 268       | LP 3/29[POU]           |            | ICG-T              |
|                 | SRR7961431 | 200         | 281       | LZ 33                  |            | ICG-T              |
|                 | SRR7961430 | 200         | 163       | M8 [SUR]_1             |            | ICG-T              |
|                 | SRR7961414 | 200         | 479       | M8 [SUR]_2             |            | ICG-T              |
|                 | SRR7961415 | 200         | 258       | NA 189                 |            | ICG-T              |
|                 | SRR7961416 | 200         | 374       | NA 26                  |            | ICG-T              |
|                 | SRR7961417 | 200         | 206       | NA 68                  |            | ICG-T              |
|                 | SRR7961418 | 200         | 336       | RIM 113[MEX]           |            | ICG-T              |
|                 | SRR7961419 | 200         | 81        | SCA 6_1                |            | ICG-T              |
|                 | SRR7961420 | 200         | 260       | SCA 6_2                |            | ICG-T              |
|                 | SRR7961421 | 200         | 422       | SLC 18                 |            | ICG-T              |
|                 | SRR7961412 | 200         | 655       | SLC 8                  |            | ICG-T              |
|                 | SRR7961413 | 200         | 1667      | UF 38                  |            | ICG-T              |
| PRJNA77799 [2]  | SRR377722  | 120         | 2389      | <i>T. grandiflorum</i> | 04-0254    | TARS               |
|                 | SRR377709  | 120         | 2145      | EET 64                 | PI 275669  | TARS               |
|                 | SRR376997  | 120         | 2317      | Amelonado              | TARS 16542 | TARS               |
|                 | SRR376998  | 120         | 1493      | Criollo 22             | Criollo-22 | SPCL               |
|                 | SRR377711  | 120         | 1545      | ICS 1                  | TARS 16656 | TARS               |
|                 | SRR377712  | 160         | 2868      | ICS 6                  | TARS 16658 | TARS               |
|                 | SRR377715  | 160         | 2844      | ICS 39                 | TARS 16664 | TARS               |
|                 | SRR377719  | 160         | 2588      | Pentagonum             | TARS 12044 | TARS               |
|                 | SRR377720  | 118         | 1607      | Scavina 6              | MIA 29885  | SPCL               |

|             | SRR377721  | 160 | 2735 | Stahel  | MIA 27956 | TARS       |
|-------------|------------|-----|------|---------|-----------|------------|
| PRJNA486011 |            |     |      |         |           |            |
| [3]*        | SRR7774196 | 172 | 3996 | SCA 6** | Tc16548   | USDA-Miami |
|             | SRR7774209 | 172 | 8204 | EET 395 | 18186     | ICG-T      |
|             | SRR7774247 | 172 | 8204 | UF 12   | 17434     | CATIE      |
|             | SRR7774302 | 119 | 8819 | BR 25   |           | Indonesia  |
|             | SRR7774312 | 172 | 9197 | ICS 6   | Tc00551   | ICG-T      |

\* All two hundred runs reported in the study were analysed, however, only data for the runs found infected with virus are presented.

\*\*comments from the original study. "Sample with \*\* is an offset from what SCA 6 should be. It resulted in an admixed individual and researchers interested in looking at SCA 6 should not use this accession as a representative sample from SCA 6 (admixture analysis showed this is a hybrid)".

|            |                                                                                                      |
|------------|------------------------------------------------------------------------------------------------------|
| CATIE      | Centro Agronómico Tropical de Investigación y Enseñanza, Costa Rica.                                 |
| ICG-T      | International Cocoa Genebank, Trinidad, Trinidad and Tobago.                                         |
| SPCL       | Sustainable Perennial Crops Laboratory: Beltsville, MD, USA                                          |
| TARS       | Tropical Agriculture Research Station, Puerto Rico.                                                  |
| USDA-Miami | United States Department of Agriculture, Subtropical Horticultural Research Station, Miami, FL, USA. |

## References

1. Osorio-Guarín, J.A.; Quackenbush, C.R.; Cornejo, O.E. Ancestry informative alleles captured with reduced representation library sequencing in *Theobroma cacao*. *PloS one* **2018**, *13*, 10. doi: 10.1371/journal.pone.0203973
2. Kane, N.; Sveinsson, S.; Dempewolf, H.; Yang, J.Y.; Zhang, D.; Engels, J.M.; Cronk, Q. Ultra-barcoding in cacao (*Theobroma* spp.; Malvaceae) using whole chloroplast genomes and nuclear ribosomal DNA. *Am J Bot.* **2012**, *99*, 2. doi: 10.3732/ajb.1100570.
3. Cornejo, O.E.; Yee, M.C.; Dominguez, V.; Andrews, M.; Sockell, A.; Strandberg, E.; Livingstone, D.3rd; Stack, C.; Romero, A.; Umaharan, P.; Royaert, S.; Tawari, N.R.; Ng, P.; Gutierrez, O.; Phillips, W.; Mockaitis, K.; Bustamante, C.D.; Motamayor, J.C. Population genomic analyses of the chocolate tree, *Theobroma cacao* L., provide insights into its domestication process. *Commun. biol.* **2018**, *1*, 167. doi: 10.1038/s42003-018-0168-6
